# Supplementary material for: Evolution during Three Ripening Stages of Évora Cheese
Source: Foods. 2020 Aug 19;9(9):1140. doi: 10.3390/foods9091140 (PMC7555954; doi:10.3390/foods9091140)
Supplement: Supplementary file 1 [file foods-09-01140-s001.zip]

Archive with 4 entries (4 files):
- S1.pdf
- S2.docx
- S3.docx
- S4.docx
