# Supplementary material for: Evolution during Three Ripening Stages of Évora Cheese
Source: Foods. 2020 Aug 19;9(9):1140. doi: 10.3390/foods9091140 (PMC7555954; doi:10.3390/foods9091140)
Supplement: Supplementary file 1 [file foods-09-01140-s001.zip › S1.pdf]

## SENSORY ANALYSIS OF ÉVORA CHEESE EVALUATION SHEET – S1

Date: \_\_\_\_/\_\_\_\_/\_\_\_\_

Taster code: \_\_\_\_\_

### CRUST

#### APPEARANCE

|            | 0                                                                                   | 1                        | 2                        | 3                        | 4                        | 5                                                                                     |
|------------|-------------------------------------------------------------------------------------|--------------------------|--------------------------|--------------------------|--------------------------|---------------------------------------------------------------------------------------|
| Uniformity | <input type="checkbox"/>                                                            | <input type="checkbox"/> | <input type="checkbox"/> | <input type="checkbox"/> | <input type="checkbox"/> | <input type="checkbox"/>                                                              |
|            | Not at all                                                                          |                          |                          |                          |                          | Very much                                                                             |
| Smoothness | <input type="checkbox"/>                                                            | <input type="checkbox"/> | <input type="checkbox"/> | <input type="checkbox"/> | <input type="checkbox"/> | <input type="checkbox"/>                                                              |
|            | Not at all                                                                          |                          |                          |                          |                          | Very much                                                                             |
| Cracks     | <input type="checkbox"/>                                                            | <input type="checkbox"/> | <input type="checkbox"/> | <input type="checkbox"/> | <input type="checkbox"/> | <input type="checkbox"/>                                                              |
|            | None                                                                                |                          |                          |                          |                          | Many                                                                                  |
| Hardness   | <input type="checkbox"/>                                                            | <input type="checkbox"/> | <input type="checkbox"/> | <input type="checkbox"/> | <input type="checkbox"/> | <input type="checkbox"/>                                                              |
|            | Very soft                                                                           |                          |                          |                          |                          | Very hard                                                                             |
| Color      | <input type="checkbox"/>                                                            | <input type="checkbox"/> | <input type="checkbox"/> | <input type="checkbox"/> | <input type="checkbox"/> | <input type="checkbox"/>                                                              |
|            | Light                                                                               |                          |                          |                          |                          | Dark                                                                                  |
| Shape      | <input type="checkbox"/>                                                            | <input type="checkbox"/> | <input type="checkbox"/> | <input type="checkbox"/> | <input type="checkbox"/> | <input type="checkbox"/>                                                              |
|            | 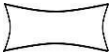 |                          |                          |                          |                          | 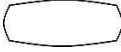 |

#### ODOUR/AROMA

|         | 0                        | 1                        | 2                        | 3                        | 4                        | 5                        |
|---------|--------------------------|--------------------------|--------------------------|--------------------------|--------------------------|--------------------------|
| Intense | <input type="checkbox"/> |
|         | Not at all               |                          |                          |                          |                          | Very                     |
| Lactic  | <input type="checkbox"/> |
|         | Not at all               |                          |                          |                          |                          | Very                     |
| Animal  | <input type="checkbox"/> |
|         | Not at all               |                          |                          |                          |                          | Very                     |

### TASTE

|         | 0                    | 1                    | 2                    | 3                    | 4                    | 5                    |
|---------|----------------------|----------------------|----------------------|----------------------|----------------------|----------------------|
| Intense | <input type="text"/> |
|         | Not at all           |                      |                      |                      |                      | Very                 |
| Salty   | <input type="text"/> |
|         | Not at all           |                      |                      |                      |                      | Very                 |
| Acidic  | <input type="text"/> |
|         | Not at all           |                      |                      |                      |                      | Very                 |
| Piquant | <input type="text"/> |
|         | Not at all           |                      |                      |                      |                      | Very                 |
| Lactic  | <input type="text"/> |
|         | Not at all           |                      |                      |                      |                      | Very                 |

### TEXTURE

|         | 0                    | 1                    | 2                    | 3                    | 4                    | 5                    |
|---------|----------------------|----------------------|----------------------|----------------------|----------------------|----------------------|
| Firm    | <input type="text"/> |
|         | Not at all           |                      |                      |                      |                      | Very                 |
| Grainy  | <input type="text"/> |
|         | Not at all           |                      |                      |                      |                      | Very                 |
| Pasty   | <input type="text"/> |
|         | Not at all           |                      |                      |                      |                      | Very                 |
| Buttery | <input type="text"/> |
|         | Not at all           |                      |                      |                      |                      | Very                 |

### GLOBAL APPRECIATION

| 0                    | 1                    | 2                    | 3                    | 4                    | 5                    |
|----------------------|----------------------|----------------------|----------------------|----------------------|----------------------|
| <input type="text"/> |
| I don't like it      |                      |                      |                      |                      | I like it very much  |

### INTENT OF PURCHASE

| 0                    | 1                    | 2                    | 3                    | 4                    | 5                              |
|----------------------|----------------------|----------------------|----------------------|----------------------|--------------------------------|
| <input type="text"/>           |
| I would never buy it |                      |                      |                      |                      | I would prefer it to any other |
