# Supplementary material for: Evolution during Three Ripening Stages of Évora Cheese
Source: Foods. 2020 Aug 19;9(9):1140. doi: 10.3390/foods9091140 (PMC7555954; doi:10.3390/foods9091140)
Supplement: Supplementary file 1 [file foods-09-01140-s001.zip › S4.docx]

**Table S4** – Spearman’s correlation coefficients between sensory analysis scores

|  | Uniform | Smooth | Cracks | Hard | Color | Shape | O-Inten | O-Lact | O-Animal | Inten | Salty | Acid | Piquant | Lact | Firm | Grain | Pasty | Butter | Gl.App. | Purch |
| --- | --- | --- | --- | --- | --- | --- | --- | --- | --- | --- | --- | --- | --- | --- | --- | --- | --- | --- | --- | --- |
| Uniform | 1.000 | 0.516** | -0.185* | -0.053 | -0.106 | 0.010 | -0.050 | -0.025 | -0.183* | -0.044 | 0.077 | 0.007 | 0.032 | -0.036 | -0.018 | -0.010 | -0.057 | 0.066 | 0.083 | 0.063 |
| Smooth | 0.516** | 1.000 | -0.019 | -0.140 | -0.037 | 0.150 | -0.136 | -0.035 | -0.402** | -0.013 | 0.088 | -0.137 | -0.093 | 0.072 | 0.010 | -0.015 | -0.315** | -0.095 | 0.149 | 0.119 |
| Cracks | -0.185* | -0.019 | 1.000 | -0.144 | 0.017 | -0.072 | -0.212* | -0.094 | 0.082 | -0.026 | -0.160 | 0.018 | -0.006 | -0.098 | -0.075 | -0.080 | 0.041 | 0.036 | -0.025 | -0.013 |
| Hard | -0.053 | -0.140 | -0.144 | 1.000 | 0.628** | -0.250** | 0.552** | -0.300** | 0.343** | 0.378** | 0.264** | -0.015 | 0.416** | -0.406** | 0.683** | 0.289** | -0.471** | -0.574** | 0.308** | 0.282** |
| Color | -0.106 | -0.037 | 0.017 | 0.628** | 1.000 | -0.143 | 0.374** | -0.393** | 0.398** | 0.413** | 0.114 | -0.115 | 0.321** | -0.428** | 0.712** | 0.169 | -0.573** | -0.629** | 0.174* | 0.191* |
| Shape | 0.010 | 0.150 | -0.072 | -0.250** | -0.143 | 1.000 | -0.081 | 0.235** | -0.154 | 0.019 | 0.051 | -0.078 | -0.013 | 0.282** | -0.176* | 0.147 | 0.134 | 0.252** | 0.116 | 0.058 |
| O-Inten | -0.050 | -0.136 | -0.212* | 0.552** | 0.374** | -0.081 | 1.000 | -0.085 | 0.405** | 0.426** | 0.218* | 0.108 | 0.439** | -0.113 | 0.399** | 0.329** | -0.197* | -0.319** | 0.283** | 0.329** |
| O-Lact | -0.025 | -0.035 | -0.094 | -0.300** | -0.393** | 0.235** | -0.085 | 1.000 | -0.039 | -0.215* | -0.072 | 0.031 | -0.273** | 0.677** | -0.409** | -0.015 | 0.305** | 0.493** | -0.052 | -0.038 |
| O-Animal | -0.183* | -0.402** | 0.082 | 0.343** | 0.398** | -0.154 | 0.405** | -0.039 | 1.000 | 0.199* | -0.031 | 0.036 | 0.229** | -0.169 | 0.269** | 0.009 | 0.029 | -0.209* | 0.095 | 0.123 |
| Inten | -0.044 | -0.013 | -0.026 | 0.378** | 0.413** | 0.019 | 0.426** | -0.215* | 0.199* | 1.000 | 0.295** | 0.035 | 0.417** | -0.321** | 0.557** | 0.320** | -0.355** | -0.353** | 0.224** | 0.208* |
| Salty | 0.077 | 0.088 | -0.160 | 0.264** | 0.114 | 0.051 | 0.218* | -0.072 | -0.031 | 0.295** | 1.000 | 0.194* | 0.447** | -0.106 | 0.224** | 0.383** | -0.076 | -0.102 | 0.001 | -0.026 |
| Acid | 0.007 | -0.137 | 0.018 | -0.015 | -0.115 | -0.078 | 0.108 | 0.031 | 0.036 | 0.035 | 0.194* | 1.000 | 0.246** | 0.134 | -0.141 | 0.110 | 0.111 | -0.016 | -0.263** | -0.226** |
| Piquant | 0.032 | -0.093 | -0.006 | 0.416** | 0.321** | -0.013 | 0.439** | -0.273** | 0.229** | 0.417** | 0.447** | 0.246** | 1.000 | -0.316** | 0.463** | 0.375** | -0.075 | -0.353** | 0.154 | 0.122 |
| Lact | -0.036 | 0.072 | -0.098 | -0.406** | -0.428** | 0.282** | -0.113 | 0.677** | -0.169 | -0.321** | -0.106 | 0.134 | -0.316** | 1.000 | -0.502** | 0.021 | 0.325** | 0.423** | -0.109 | -0.077 |
| Firm | -0.018 | 0.010 | -0.075 | 0.683** | 0.712** | -0.176* | 0.399** | -0.409** | 0.269** | 0.557** | 0.224** | -0.141 | 0.463** | -0.502** | 1.000 | 0.368** | -0.587** | -0.739** | 0.207* | 0.192* |
| Grain | -0.010 | -0.015 | -0.080 | 0.289** | 0.169 | 0.147 | 0.329** | -0.015 | 0.009 | 0.320** | 0.383** | 0.110 | 0.375** | 0.021 | 0.368** | 1.000 | -0.147 | -0.227** | -0.085 | -0.095 |
| Pasty | -0.057 | -0.315** | 0.041 | -0.471** | -0.573** | 0.134 | -0.197* | 0.305** | 0.029 | -0.355** | -0.076 | 0.111 | -0.075 | 0.325** | -0.587** | -0.147 | 1.000 | 0.640** | -0.216* | -0.187* |
| Butter | 0.066 | -0.095 | 0.036 | -0.574** | -0.629** | 0.252** | -0.319** | 0.493** | -0.209* | -0.353** | -0.102 | -0.016 | -0.353** | 0.423** | -0.739** | -0.227** | 0.640** | 1.000 | -0.091 | -0.083 |
| Gl.App. | 0.083 | 0.149 | -0.025 | 0.308** | 0.174* | 0.116 | 0.283** | -0.052 | 0.095 | 0.224** | 0.001 | -0.263** | 0.154 | -0.109 | 0.207* | -0.085 | -0.216* | -0.091 | 1.000 | 0.934** |
| Purch | 0.063 | 0.119 | -0.013 | 0.282** | 0.191* | 0.058 | 0.329** | -0.038 | 0.123 | 0.208* | -0.026 | -0.226** | 0.122 | -0.077 | 0.192* | -0.095 | -0.187* | -0.083 | 0.934** | 1.000 |

* - significant at p<0.05; ** - significant at p<0.01
